# Supplementary material
Source: PubMed Central journal article supplement (PMC3608686)
Supplement: NIHMS438726-supplement-Supplemental_Data.pdf [file NIHMS438726-supplement-Supplemental_Data.pdf]

## Supplementary Materials for

### **Fasting Cycles Retard Growth of Tumors and Sensitize a Range of Cancer Cell Types to Chemotherapy**

Changhan Lee, Lizzia Raffaghello, Sebastian Brandhorst, Fernando M. Safdie, Giovanna Bianchi, Alejandro Martin-Montalvo, Vito Pistoia, Min Wei, Saewon Hwang, Annalisa Merlino, Laura Emionite, Rafael de Cabo, Valter D. Longo\*

\*To whom correspondence should be addressed. E-mail: vlongo@usc.edu

Published 7 March 2012, *Sci. Transl. Med.* **4**, 124ra27 (2012)  
DOI: 10.1126/scitranslmed.3003293

#### **The PDF file includes:**

- Fig. S1. The effect of 48-hour fasting on blood glucose levels in mice.
- Fig. S2. Cell viability after starvation and DXR was confirmed by trypan blue exclusion.
- Fig. S3. Effect of starvation on DXR or CP sensitivity of 17 different cancer cell lines in vitro.
- Fig. S4. Effect of starvation alone on the sensitivity of 17 different cancer cell lines in vitro.
- Fig. S5. The effect of fasting on tumor progression.
- Fig. S6. Effect of fasting on the survival of xenograft tumor mouse models treated with DXR.
- Fig. S7. Effect of fasting on tumor burden and the antitumor effect of DXR.
- Fig. S8. Gene list of protein translation-related clusters.
- Fig. S9. Effect of starvation on CP-induced intracellular superoxide levels.

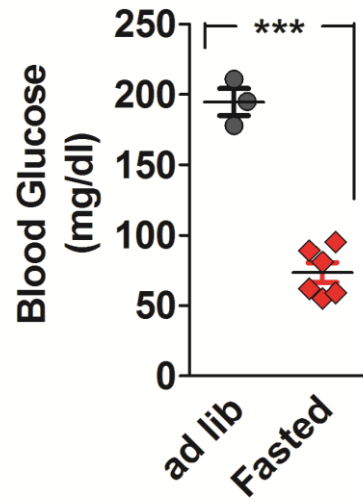

**Fig. S1.** The effect of 48-hour fasting on blood glucose levels in mice. Student's *t*-test, \*\*\* $P < 0.001$  (N=3-6).

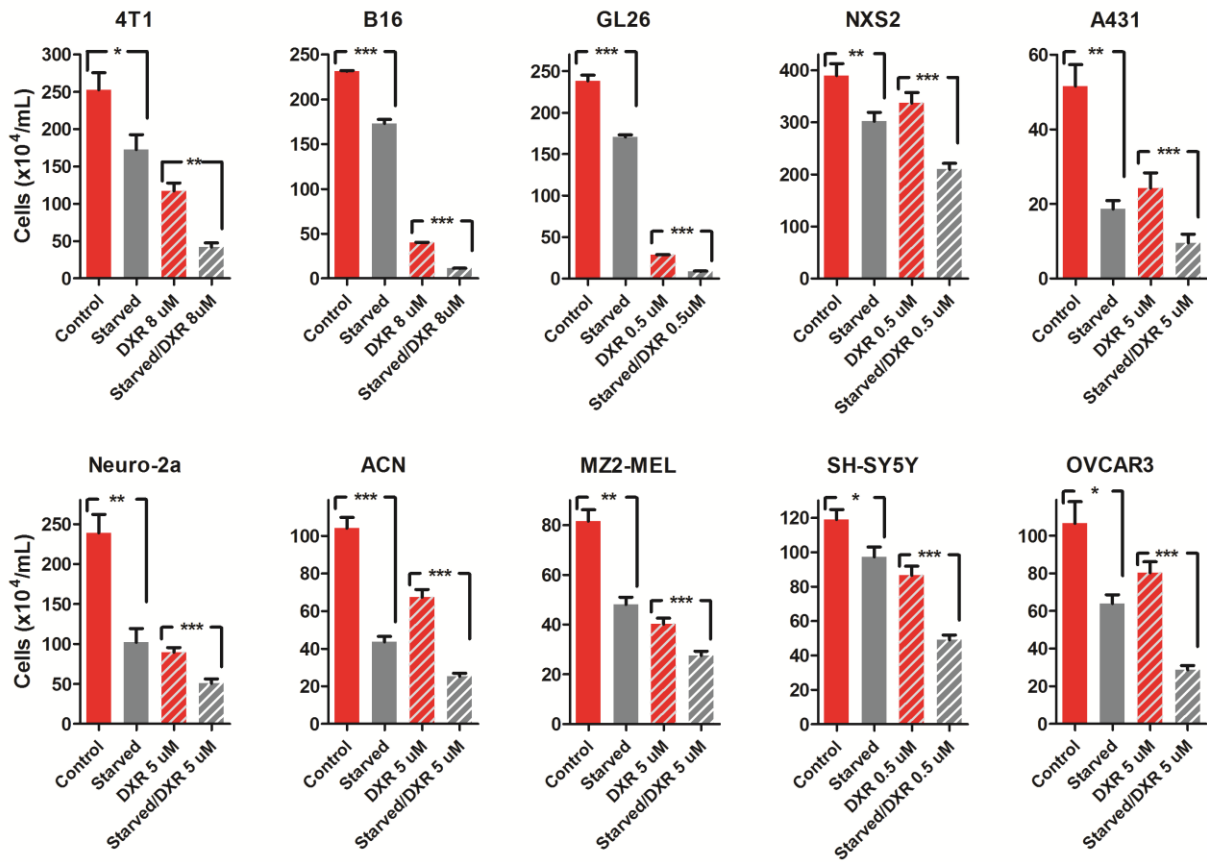

**Fig. S2, related to Fig. 1 and Fig. S2A. Cell viability after starvation and DXR was confirmed by trypan blue exclusion. (N=3) Student's *t*-test, \* $P < 0.05$ , \*\* $P < 0.01$ , \*\*\* $P < 0.001$ .**

A

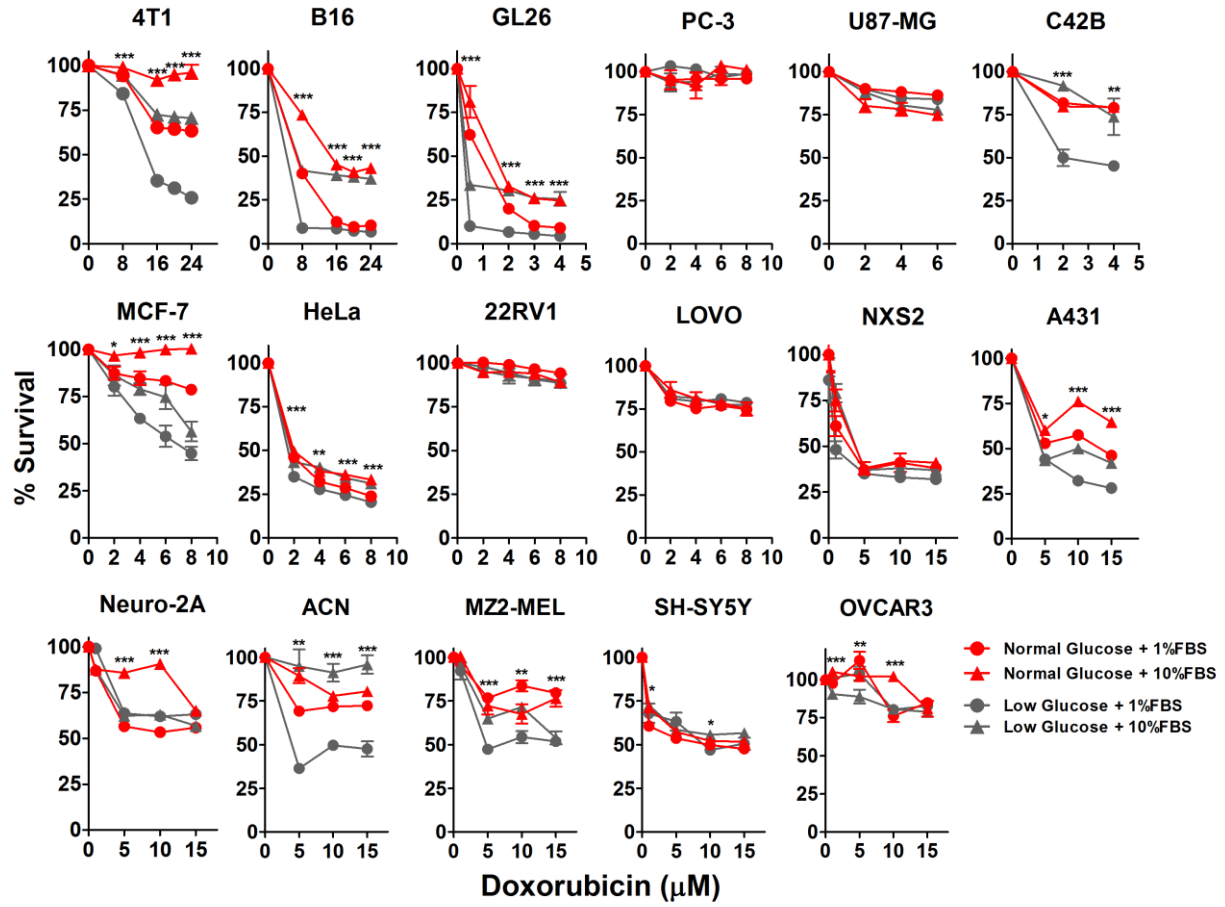

**B**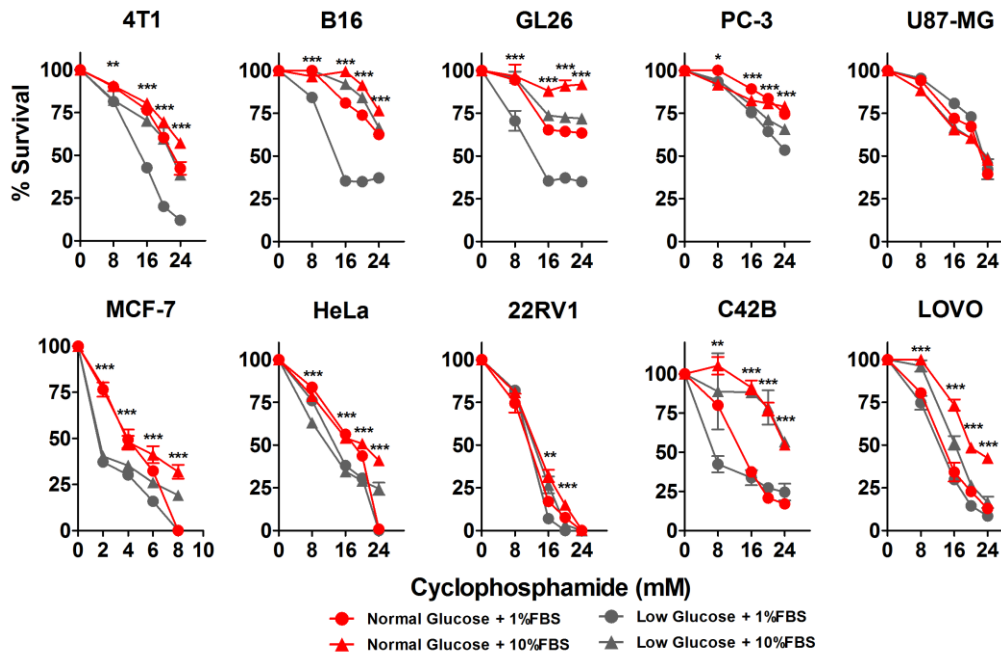

**Fig. S3, related to Fig. 1. Effect of starvation on DXR or CP sensitivity of 17 different cancer cell lines in vitro.** Fasting leads to glucose and growth factor reduction. To model this in vitro, we starved 4 different murine cancer cells - breast cancer (4T1), melanoma (B16), glioma (GL26), and neuroblastoma (NXS2 and Neuro-2a) - and also 13 different human cancer cells - prostate cancer (PC3, 22Rv1), breast cancer (MCF-7, C42B), glioblastoma (U87-MG), cervical cancer (HeLa), colon cancer (LOVO), neuroblastoma (ACN, SH-SY5Y), epidermoid carcinoma (A431), melanoma (MZ2-MEL) and ovarian cancer (OVCAR3) - and challenged with DXR or CP. Cells were cultured in normal glucose (1.0 g/L and 2.0 g/L glucose, for human and murine cells respectively), or low glucose (0.5g/L) supplemented with 1% or 10% FBS. Survival was determined by MTT reduction. (N=3-6). One-way ANOVA, \* $P < 0.05$ , \*\* $P < 0.01$ , \*\*\* $P < 0.001$ .

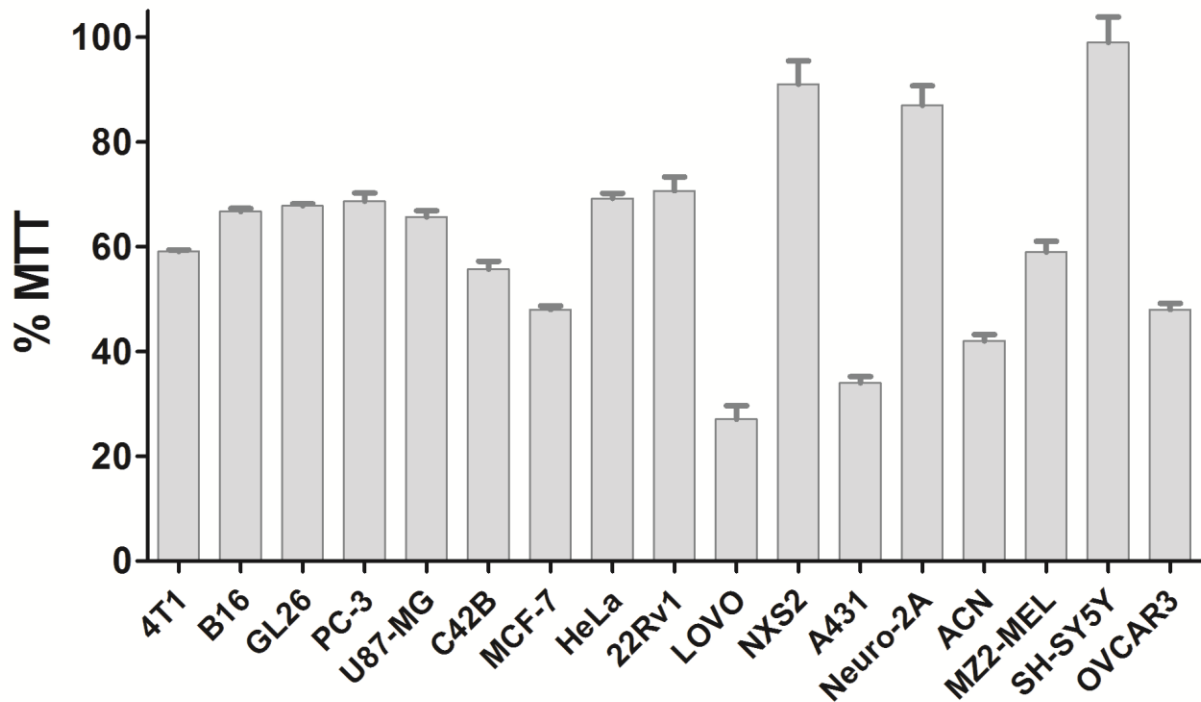

**Fig. S4, related to Figs. 1 and S3. Effect of starvation alone on the sensitivity of 17 different cancer cell lines in vitro.** Cells were cultured under starvation (0.5 g/L glucose, 1% FBS) or normal conditions (1.0 g/L and 2.0 g/L glucose, for human and murine cells respectively, 10% FBS) for 48-hours. Data shown as % MTT reduction of cells under starvation vs normal conditions (N=6-12).

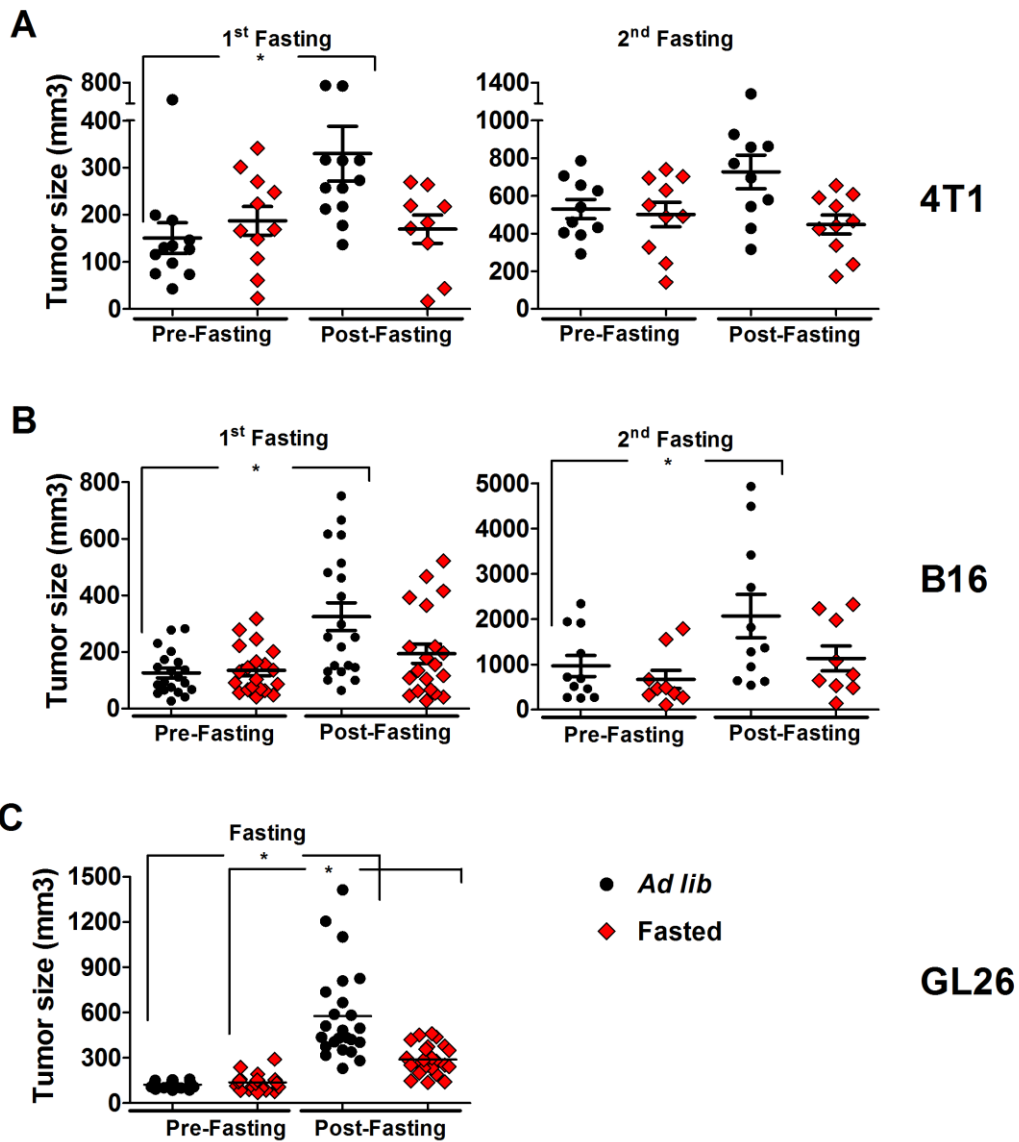

**Fig. S5, related to Fig. 2. The effect of fasting on tumor progression.** Fasting (48hours) retards the progression of subcutaneous tumors of mouse (A) breast cancer (4T1), (B) melanoma (B16), and (C) glioma (GL26). This figure shows detailed comparisons of tumor size immediately before and after fasting for 48 hours, as presented in Figure 2 A, C, E. Student's *t*-test, \**P*<0.05.

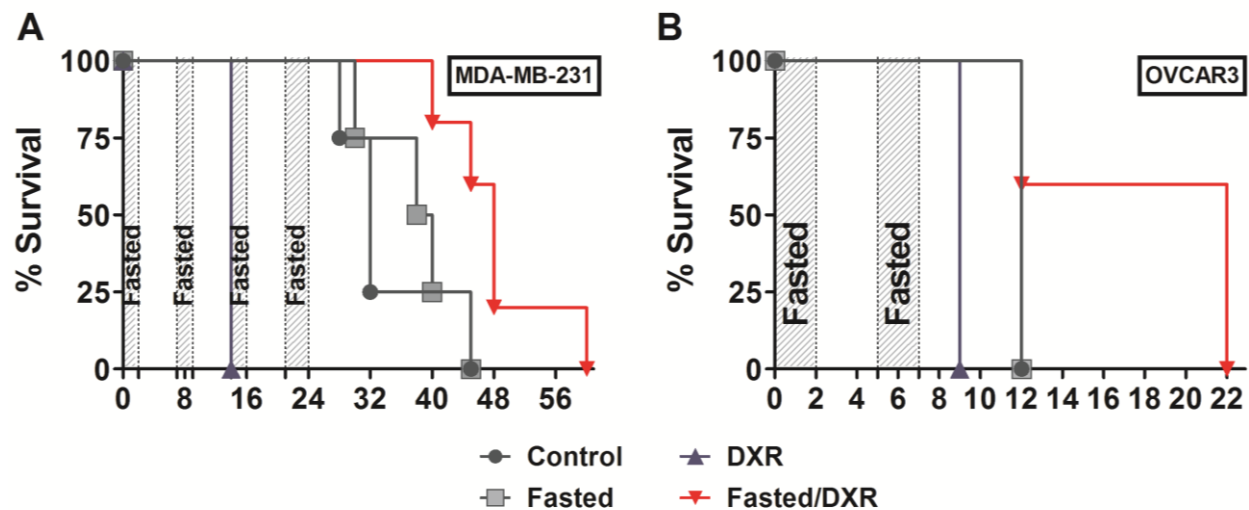

**Fig. S6, related to Fig. 2. Effect of fasting on the survival of xenograft tumor mouse models treated with DXR.** (A) Human breast cancer cells (MDA-MB-231) were subcutaneously injected into nude mice. 4 cycles of fasting (48 hours) and/or DXR were performed. Mice that were fed ad lib and treated with DXR died at day 14 for DXR toxicity (N=5). Log-rank test; control vs fasted (NS), DXR ( $P<0.05$ ), fasted/DXR ( $P<0.05$ ), DXR vs fasted/DXR ( $P<0.01$ ), DXR vs fasted ( $P<0.01$ ), fasted vs fasted/DXR ( $P<0.05$ ). (B) Human ovarian cancer cells (OVCAR3) were subcutaneously xenografted into nude mice. 2 cycles of fasting (48 hours) and/or DXR were performed. Mice that were fed ad lib and treated with DXR were terminated at day 9 due to death of all mice from DXR toxicity (N=5). Log-rank test; control vs fasted (NS), DXR ( $P<0.01$ ), fasted/DXR ( $P<0.05$ ), DXR vs fasted/DXR ( $P<0.01$ ), DXR vs fasted ( $P<0.01$ ), fasted vs fasted/DXR ( $P<0.05$ ). In both xenograft models, fasted mice treated with DXR did not experience toxicity.



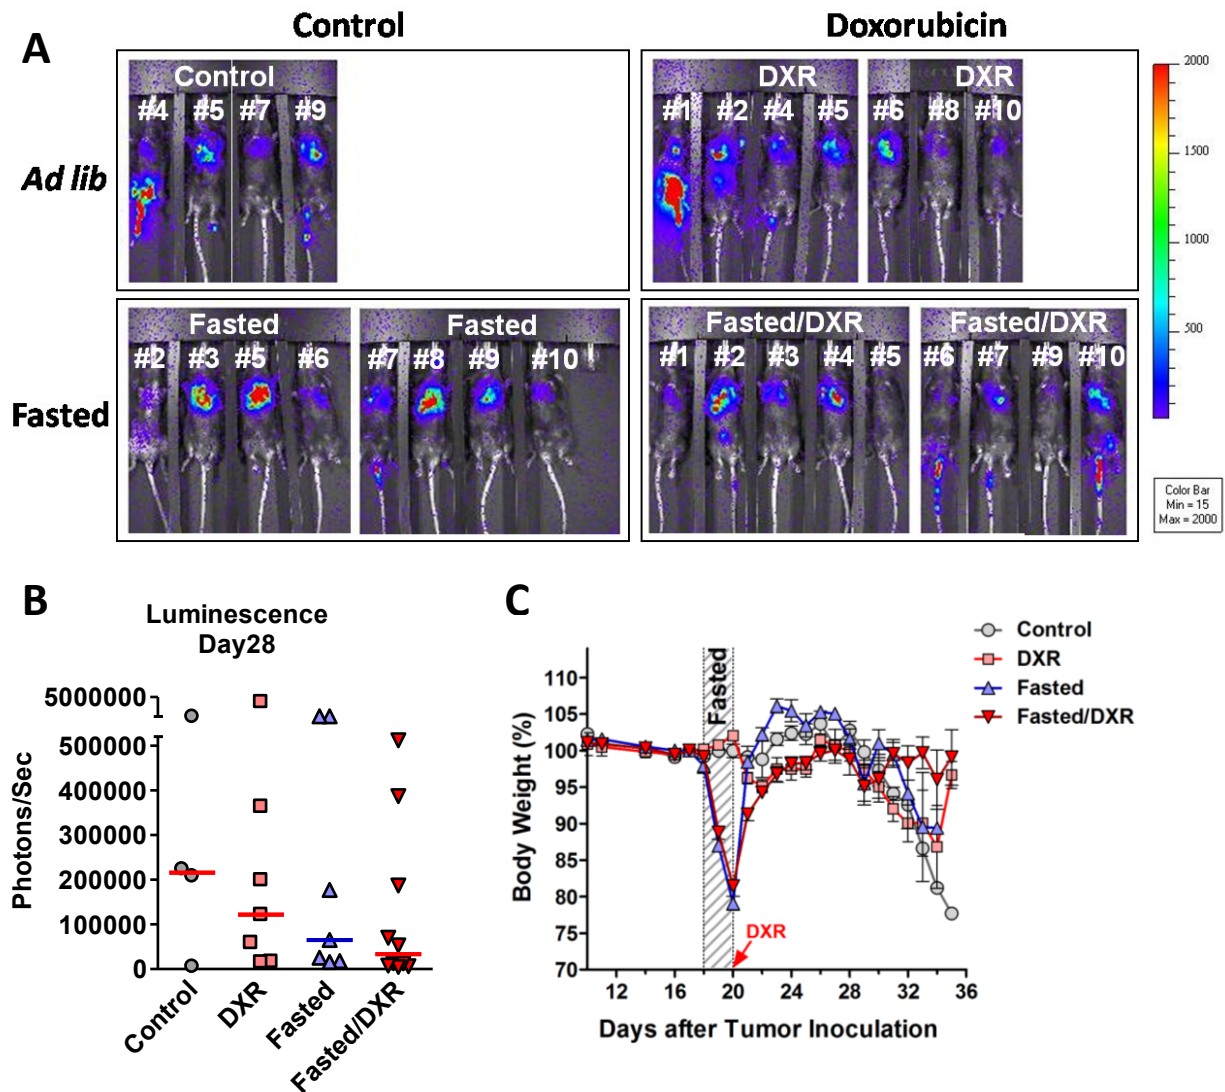

**Fig. S7, related to Fig. 3. Effect of fasting on tumor burden and the antitumor effect of DXR.** (A) Bioluminescence imaging (BLI) of the metastasized luciferase-tagged B16 melanoma cells 28 days following tumor injection and 1 cycle of fasting/DXR (N=10). Some mice from the control (n=1), DXR (n=3), and fasted/DXR (n=1) group did not show adequate metastasis and thus were not included in the figure. (B) Quantification of (A). (C) Body weight lost during fasting was rapidly recovered upon normal feeding.

| Cytosolic Ribosome | rRNA Binding | Ribosome Biogenesis |         | Translation |         |         |          | Cytosolic Large Ribosomal Subunit |
|--------------------|--------------|---------------------|---------|-------------|---------|---------|----------|-----------------------------------|
| EIF2A              | A            | 2410016006RIK       | NOL14   | A           | GFM1    | MTRF1   | RPS24    | RPL19                             |
| RPL12              | ANG          | A                   | NOL5    | AARS        | GSPT1   | NACA    | RPS26    | RPL3                              |
| RPL21              | BXDC5        | AATF                | NOL5A   | AARS2       | HARS    | NARS    | RPS27A   | RPL37                             |
| RPL22              | IMP3         | BC003885            | NOLA1   | AARSD1      | HBS1L   | NARS2   | RPS27L   | RPL39                             |
| RPL23              | MRPS17       | BMS1                | NOLA2   | ABCF1       | IARS    | NCOA5   | RPS3     | RS1                               |
| RPL27              | NOL1         | BOP1                | NOLA3   | ABTB1       | IARS2   | NOLA2   | RPS3A    | ZCCHC17                           |
| RPL28              | NOL12        | BXDC2               | OTT     | ALDH1L1     | IMP3    | OTT     | RPS4X    |                                   |
| RPL29              | NOLA1        | BXDC5               | PES1    | BC003885    | KARS    | PARS2   | RPS4Y2   |                                   |
| RPL3               | NPM1         | DDX1                | RPL12   | CS          | KHSRP   | PELO    | RPS5     |                                   |
| RPL36A             | OTT          | DDX5                | RPL21   | CYLD        | LARS    | PET112L | RPS6     |                                   |
| RPL37              | RPL23        | DDX51               | RPL22   | DARS        | LARS2   | PLEK    | RPS7     |                                   |
| RPL9               | RPL3         | EBNA1BP2            | RPL27   | EARS2       | MARS    | PLEK2   | RPS9     |                                   |
| RPS12              | RPL37        | EBP                 | RPL28   | EEF1A1      | MARS2   | POLG    | RRBP1    |                                   |
| RPS14              | RPS11        | EMG1                | RPL29   | EEF1A2      | MRPL1   | POLG2   | RS1      |                                   |
| RPS15              | RPS4X        | FCF1                | RPL3    | EEF1B2      | MRPL11  | POPDC3  | RSL1D1   |                                   |
| RPS16              | RPS9         | FRG1                | RPL36A  | EEF1D       | MRPL12  | PTRH1   | SARS     |                                   |
| RPS19              | RS1          | GNL2                | RPL37   | EEF1E1      | MRPL13  | QARS    | SARS2    |                                   |
| RPS3               |              | GNL3                | RPL7A   | EEF1G       | MRPL14  | RARS    | SCYE1    |                                   |
| RPS3A              |              | GNL3L               | RPL9    | EEF2        | MRPL15  | RARS2   | SECISBP2 |                                   |
| RPS4X              |              | GTPBP4              | RPS12   | EEFSEC      | MRPL16  | RBM3    | SEPSECS  |                                   |
| RPS5               |              | IMP3                | RPS14   | EIF1A       | MRPL17  | RPL12   | SPP2     |                                   |
| RPS6               |              | IMP4                | RPS15   | EIF1B       | MRPL18  | RPL13A  | TARS     |                                   |
| RPS6KB1            |              | IPO4                | RPS16   | EIF2A       | MRPL2   | RPL18   | TARSL2   |                                   |
| RPS7               |              | MRPL1               | RPS19   | EIF2AK2     | MRPL20  | RPL19   | TNS4     |                                   |
| RPS8               |              | MRPL10              | RPS2    | EIF2B1      | MRPL22  | RPL21   | TPR      |                                   |
|                    |              | MRPL14              | RPS24   | EIF2B2      | MRPL23  | RPL22   | TSFM     |                                   |
|                    |              | MRPL2               | RPS3    | EIF2B4      | MRPL24  | RPL22L1 | TUFM     |                                   |
|                    |              | MRPL22              | RPS3A   | EIF2B5      | MRPL27  | RPL23   | UBA5     |                                   |
|                    |              | MRPL23              | RPS4X   | EIF2C2      | MRPL3   | RPL24   | UBR1     |                                   |
|                    |              | MRPL3               | RPS5    | EIF2C3      | MRPL30  | RPL27   | VARS     |                                   |
|                    |              | MRPL30              | RPS6    | EIF2C4      | MRPL33  | RPL27A  | VARS2    |                                   |
|                    |              | MRPL4               | RPS6KA1 | EIF2S2      | MRPL34  | RPL28   | WARS     |                                   |
|                    |              | MRPS2               | RPS6KA3 | EIF2S3X     | MRPL35  | RPL29   | WARS2    |                                   |
|                    |              | MRPS26              | RPS6KB1 | EIF3B       | MRPL36  | RPL3    | WDR9     |                                   |
|                    |              | MRTO4               | RPS7    | EIF3D       | MRPL39  | RPL30   |          |                                   |
|                    |              | NHP2L1              | RPS8    | EIF3EIP     | MRPL4   | RPL31   |          |                                   |
|                    |              | NIP7                | RRN3    | EIF3F       | MRPL43  | RPL35   |          |                                   |
|                    |              | NOG                 | SDAD1   | EIF3G       | MRPL47  | RPL36A  |          |                                   |
|                    |              | NOL1                |         | EIF3H       | MRPL48  | RPL36AL |          |                                   |
|                    |              |                     |         | EIF3I       | MRPL49  | RPL37   |          |                                   |
|                    |              |                     |         | EIF3K       | MRPL51  | RPL38   |          |                                   |
|                    |              |                     |         | EIF4A1      | MRPL9   | RPL39   |          |                                   |
|                    |              |                     |         | EIF4A2      | MRPS10  | RPL3L   |          |                                   |
|                    |              |                     |         | EIF4B       | MRPS11  | RPL4    |          |                                   |
|                    |              |                     |         | EIF4E       | MRPS12  | RPL41   |          |                                   |
|                    |              |                     |         | EIF4E2      | MRPS14  | RPL7A   |          |                                   |
|                    |              |                     |         | EIF4E3      | MRPS15  | RPL7L1  |          |                                   |
|                    |              |                     |         | EIF4G1      | MRPS16  | RPL9    |          |                                   |
|                    |              |                     |         | EIF4G2      | MRPS17  | RPLP1   |          |                                   |
|                    |              |                     |         | EIF4H       | MRPS18A | RPP30   |          |                                   |
|                    |              |                     |         | EIF5        | MRPS18B | RPP38   |          |                                   |
|                    |              |                     |         | EIF5A       | MRPS18C | RPS11   |          |                                   |
|                    |              |                     |         | EIF6        | MRPS2   | RPS12   |          |                                   |
|                    |              |                     |         | EPRS        | MRPS21  | RPS13   |          |                                   |
|                    |              |                     |         | ETF1        | MRPS30  | RPS14   |          |                                   |
|                    |              |                     |         | FARS2       | MRPS5   | RPS15   |          |                                   |
|                    |              |                     |         | FARSA       | MRPS6   | RPS15A  |          |                                   |
|                    |              |                     |         | FARSB       | MRPS7   | RPS16   |          |                                   |
|                    |              |                     |         | FBXW17      | MRPS9   | RPS19   |          |                                   |
|                    |              |                     |         | GARS        | MRRF    | RPS2    |          |                                   |
|                    |              |                     |         | GART        | MTIF3   | RPS21   |          |                                   |

| Ribosome |          | Cytosolic Small Ribosomal Subunit | Structural Constituent of Ribosome |          | RibonucleoProtein Complex |         |         |         |         |
|----------|----------|-----------------------------------|------------------------------------|----------|---------------------------|---------|---------|---------|---------|
| A        | RPL27A   | RPS13                             | A                                  | RPL13A   | A                         | MRPL24  | MRPS24  | RPL27   | RPS7    |
| APEX1    | RPL28    | RPS14                             | BC003885                           | RPL18    | CASC3                     | MRPL27  | MRPS25  | RPL27A  | RPS8    |
| BC003885 | RPL29    | RPS2                              | CYLD                               | RPL19    | D10ERTD322E               | MRPL28  | MRPS26  | RPL28   | RPS9    |
| CYLD     | RPL3     | RPS24                             | FBXW17                             | RPL21    | DAP                       | MRPL3   | MRPS27  | RPL29   | RPSA    |
| FBXW17   | RPL30    | RPS4X                             | MRPL1                              | RPL22    | DAP3                      | MRPL30  | MRPS28  | RPL3    | RRP9    |
| MRPL1    | RPL31    | RPS6                              | MRPL10                             | RPL22L1  | EFTUD2                    | MRPL33  | MRPS30  | RPL30   | RS1     |
| MRPL11   | RPL35    | RPS7                              | MRPL11                             | RPL23    | HNRNPA2B1                 | MRPL34  | MRPS31  | RPL31   | SNRP70  |
| MRPL12   | RPL36A   | RPS9                              | MRPL12                             | RPL24    | HNRNPC                    | MRPL35  | MRPS33  | RPL35   | SNRPA   |
| MRPL13   | RPL36AL  | RS1                               | MRPL13                             | RPL27    | HNRNPAB                   | MRPL36  | MRPS34  | RPL37   | SNRPB   |
| MRPL14   | RPL37    |                                   | MRPL14                             | RPL27A   | HNRPF                     | MRPL37  | MRPS35  | RPL38   | SNRPB2  |
| MRPL15   | RPL38    |                                   | MRPL15                             | RPL28    | HNRPH1                    | MRPL38  | MRPS5   | RPL39   | SNRPD1  |
| MRPL16   | RPL39    |                                   | MRPL16                             | RPL29    | HNRPK                     | MRPL39  | MRPS6   | RPL3L   | SNRPD2  |
| MRPL17   | RPL3L    |                                   | MRPL17                             | RPL3     | HNRPL                     | MRPL4   | MRPS7   | RPL4    | SNRPD3  |
| MRPL18   | RPL4     |                                   | MRPL18                             | RPL30    | HNRPLL                    | MRPL40  | MRPS9   | RPL41   | SNRPG   |
| MRPL2    | RPL41    |                                   | MRPL2                              | RPL31    | HNRPM                     | MRPL43  | MVP     | RPL7A   | SRP1    |
| MRPL20   | RPL7A    |                                   | MRPL20                             | RPL35    | HNRPUL1                   | MRPL45  | NHP2L1  | RPL7L1  | SRP14   |
| MRPL22   | RPL7L1   |                                   | MRPL22                             | RPL36A   | IMP3                      | MRPL46  | NOLA1   | RPL9    | SRP19   |
| MRPL24   | RPL9     |                                   | MRPL23                             | RPL36AL  | IMP4                      | MRPL47  | NOLA2   | RPLP1   | SRP68   |
| MRPL27   | RPLP1    |                                   | MRPL24                             | RPL37    | LARP6                     | MRPL48  | NOLA3   | RPLP2   | SRP9    |
| MRPL3    | RPLP2    |                                   | MRPL27                             | RPL38    | LSM10                     | MRPL49  | OTT     | RPS10   | SRPR    |
| MRPL30   | RPP30    |                                   | MRPL3                              | RPL39    | LSM2                      | MRPL50  | PA2G4   | RPS11   | SRPRB   |
| MRPL33   | RPP38    |                                   | MRPL30                             | RPL3L    | LSM3                      | MRPL51  | PCBP1   | RPS12   | STAU1   |
| MRPL34   | RPS11    |                                   | MRPL33                             | RPL4     | LSM4                      | MRPL52  | PCBP2   | RPS13   | SYNC    |
| MRPL35   | RPS12    |                                   | MRPL34                             | RPL41    | LSM5                      | MRPL53  | PCBP3   | RPS14   | SYNCRIP |
| MRPL36   | RPS13    |                                   | MRPL35                             | RPL7A    | LSM6                      | MRPL54  | PRMT2   | RPS15   | TERT    |
| MRPL4    | RPS14    |                                   | MRPL36                             | RPL7L1   | LSM8                      | MRPL55  | PRMT3   | RPS15A  | TRIM2   |
| MRPL48   | RPS15    |                                   | MRPL39                             | RPL9     | MKRN3                     | MRPL9   | PTBP1   | RPS16   | TRIM21  |
| MRPL49   | RPS15A   |                                   | MRPL4                              | RPLP1    | MRPL1                     | MRPS10  | PUF60   | RPS19   | TRO     |
| MRPL9    | RPS16    |                                   | MRPL47                             | RPLP2    | MRPL10                    | MRPS11  | RALY    | RPS2    | TROVE2  |
| MRPS10   | RPS19    |                                   | MRPL48                             | RPP30    | MRPL11                    | MRPS12  | RBM14   | RPS21   | U2AF2   |
| MRPS11   | RPS2     |                                   | MRPL49                             | RPP38    | MRPL12                    | MRPS14  | RBMX    | RPS24   | UBA5    |
| MRPS12   | RPS21    |                                   | MRPL51                             | RPS10    | MRPL13                    | MRPS15  | ROD1    | RPS25   | YBX2    |
| MRPS14   | RPS24    |                                   | MRPL9                              | RPS11    | MRPL14                    | MRPS16  | RPL12   | RPS26   | ZCCHC17 |
| MRPS15   | RPS26    |                                   | MRPS10                             | RPS12    | MRPL15                    | MRPS17  | RPL13A  | RPS27A  | ZRSR2   |
| MRPS16   | RPS27A   |                                   | MRPS11                             | RPS13    | MRPL16                    | MRPS18A | RPL18   | RPS27L  |         |
| MRPS17   | RPS27L   |                                   | MRPS12                             | RPS14    | MRPL17                    | MRPS18B | RPL19   | RPS3    |         |
| MRPS18A  | RPS3     |                                   | MRPS14                             | RPS15    | MRPL18                    | MRPS18C | RPL21   | RPS3A   |         |
| MRPS18B  | RPS3A    |                                   | MRPS15                             | RPS15A   | MRPL2                     | MRPS2   | RPL22   | RPS4X   |         |
| MRPS18C  | RPS4X    |                                   | MRPS16                             | RPS16    | MRPL20                    | MRPS21  | RPL22L1 | RPS5    |         |
| MRPS2    | RPS4Y2   |                                   | MRPS17                             | RPS19    | MRPL22                    | MRPS22  | RPL23   | RPS6    |         |
| MRPS21   | RPS5     |                                   | MRPS18A                            | RPS2     | MRPL23                    | MRPS23  | RPL24   | RPS6KL1 |         |
| MRPS30   | RPS6     |                                   | MRPS18B                            | RPS21    |                           |         |         |         |         |
| MRPS5    | RPS7     |                                   | MRPS18C                            | RPS24    |                           |         |         |         |         |
| MRPS6    | RPS9     |                                   | MRPS2                              | RPS26    |                           |         |         |         |         |
| MRPS7    | RRBP1    |                                   | MRPS21                             | RPS27A   |                           |         |         |         |         |
| MRPS9    | RS1      |                                   | MRPS22                             | RPS27L   |                           |         |         |         |         |
| NOLA2    | RSL1D1   |                                   | MRPS23                             | RPS3     |                           |         |         |         |         |
| OTT      | SECISBP2 |                                   | MRPS24                             | RPS3A    |                           |         |         |         |         |
| PLEK     | SPP2     |                                   | MRPS25                             | RPS4X    |                           |         |         |         |         |
| PLEK2    | SRP68    |                                   | MRPS26                             | RPS5     |                           |         |         |         |         |
| POPDC3   | TG       |                                   | MRPS30                             | RPS6     |                           |         |         |         |         |
| RPL12    | TNS4     |                                   | MRPS5                              | RPS6KB1  |                           |         |         |         |         |
| RPL13A   | UBA5     |                                   | MRPS6                              | RPS7     |                           |         |         |         |         |
| RPL18    | UBR1     |                                   | MRPS7                              | RPS8     |                           |         |         |         |         |
| RPL19    |          |                                   | MRPS9                              | RPS9     |                           |         |         |         |         |
| RPL21    |          |                                   | NOLA2                              | RS1      |                           |         |         |         |         |
| RPL22    |          |                                   | OTT                                | RSL1D1   |                           |         |         |         |         |
| RPL22L1  |          |                                   | PLEK                               | SECISBP2 |                           |         |         |         |         |
| RPL23    |          |                                   | PLEK2                              | SPP2     |                           |         |         |         |         |
| RPL24    |          |                                   | POPDC3                             | TNS4     |                           |         |         |         |         |
| RPL27    |          |                                   | RPL12                              | UBA5     |                           |         |         |         |         |
|          |          |                                   |                                    | UBR1     |                           |         |         |         |         |

**Fig. S8, related to Fig. 4B. Gene list of protein translation-related clusters.** The list of genes in each cluster from the gene ontology analysis in Fig.4B is shown.

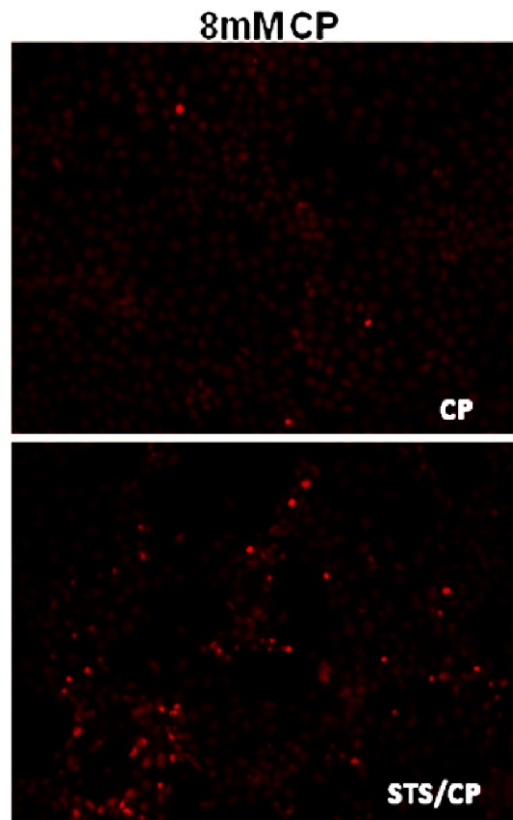

**Fig. S9, related to Fig. 5D. Effect of starvation on CP-induced intracellular superoxide levels.** Murine breast cancer cells (4T1) were fasted and treated with CP in vitro. Superoxide levels were estimated by DHE (dihydroethidium) staining. (10x magnification).
